# Supplementary material for: A large real-world cohort study of examined lymph node standards for adequate nodal staging in early non-small cell lung cancer
Source: PubMed Central journal article supplement — Transl Lung Cancer Res. 2021 Feb;10(2):815–25. doi: 10.21037/tlcr-20-1024 (PMC7947406; doi:10.21037/tlcr-20-1024), 2021-02
Supplement: tlcr-10-02-815-dss.pdf [file tlcr-10-02-815-dss.pdf]

## Data Sharing Statement

|                     |                                                                                                                                                    |                                                                            |
|---------------------|----------------------------------------------------------------------------------------------------------------------------------------------------|----------------------------------------------------------------------------|
| <b>Article Info</b> | <a href="http://dx.doi.org/10.21037/tlcr-20-1024">http://dx.doi.org/10.21037/tlcr-20-1024</a>                                                      |                                                                            |
| <b>Item</b>         | <b>Question</b>                                                                                                                                    | <b>Authors' Response<br/>(place "-" if not applicable)</b>                 |
| 1                   | Would you like to share data collected for your study to others?                                                                                   | Yes.                                                                       |
| 2                   | If not, would you like to share the reason for your decision?                                                                                      | -                                                                          |
| 3                   | What data in particular will be shared?                                                                                                            | -                                                                          |
| 4                   | Any other documents will be share? Such as study protocol, statistical analysis plan, informed consent form, clinical study report, analytic code. | Only if the plea is permitted by the corresponding authors.                |
| 5                   | When will data availability begin?                                                                                                                 | Obeying the regular policy for all research publications.                  |
| 6                   | When will data availability end?                                                                                                                   | Obeying the regular policy for all research publications.                  |
| 7                   | To whom will you share the data?                                                                                                                   | Any scholar if his/her plea is permitted by the corresponding authors.     |
| 8                   | For what type of analysis or purpose?                                                                                                              | Only academic work with commercial purpose.                                |
| 9                   | How or where can the data/documents be obtained?                                                                                                   | Emailing to the corresponding authors, the mail is yaow7@mail.sysu.edu.cn. |
| 10                  | Any other restrictions?                                                                                                                            | -                                                                          |
