# Supplementary material for: A large real-world cohort study of examined lymph node standards for adequate nodal staging in early non-small cell lung cancer
Source: PubMed Central journal article supplement — Transl Lung Cancer Res. 2021 Feb;10(2):815–25. doi: 10.21037/tlcr-20-1024 (PMC7947406; doi:10.21037/tlcr-20-1024), 2021-02
Supplement: tlcr-10-02-815-supplementary.pdf [file tlcr-10-02-815-supplementary.pdf]

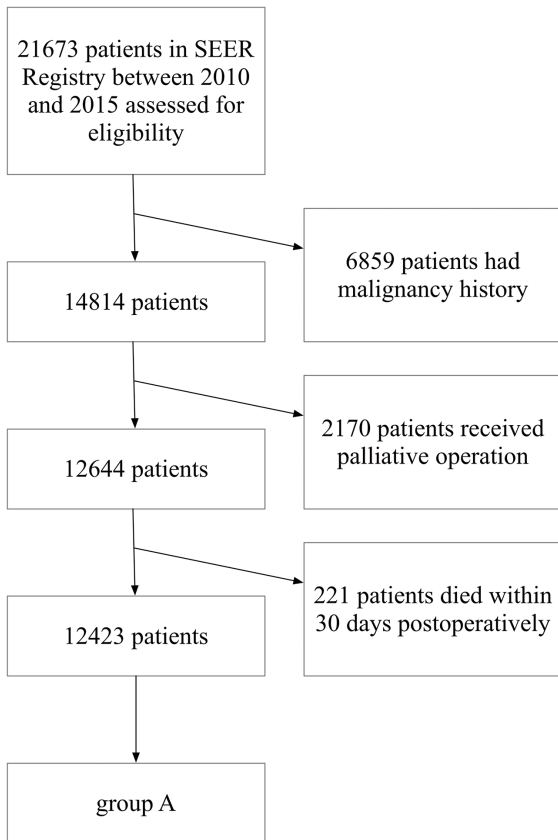

**Figure S1** Diagram of group A selection steps. SEER, Surveillance, Epidemiology, and End Results.

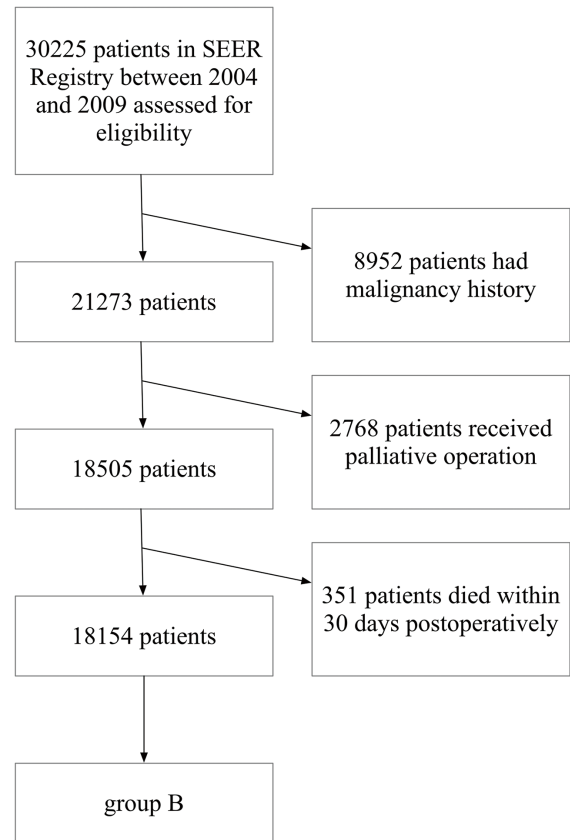

**Figure S2** Diagram of group B selection steps. SEER, Surveillance, Epidemiology, and End Results.

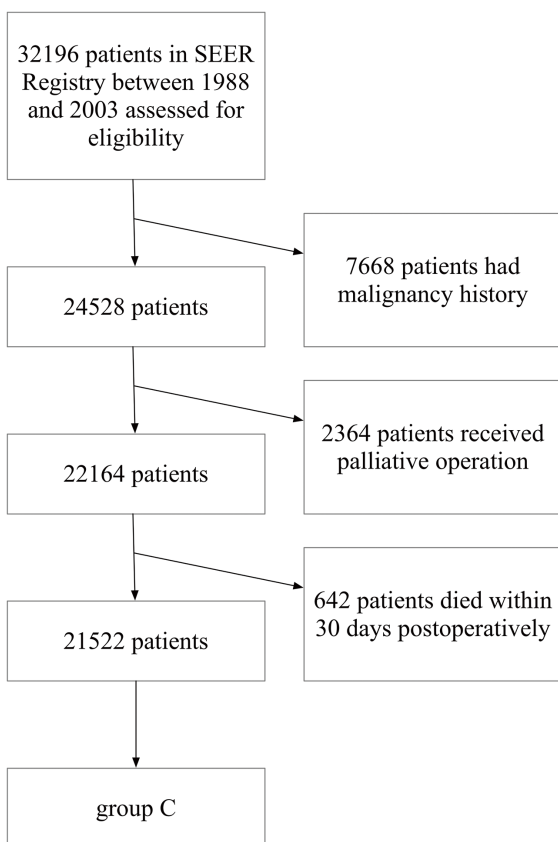

**Figure S3** Diagram of group C selection steps. SEER, Surveillance, Epidemiology, and End Results.

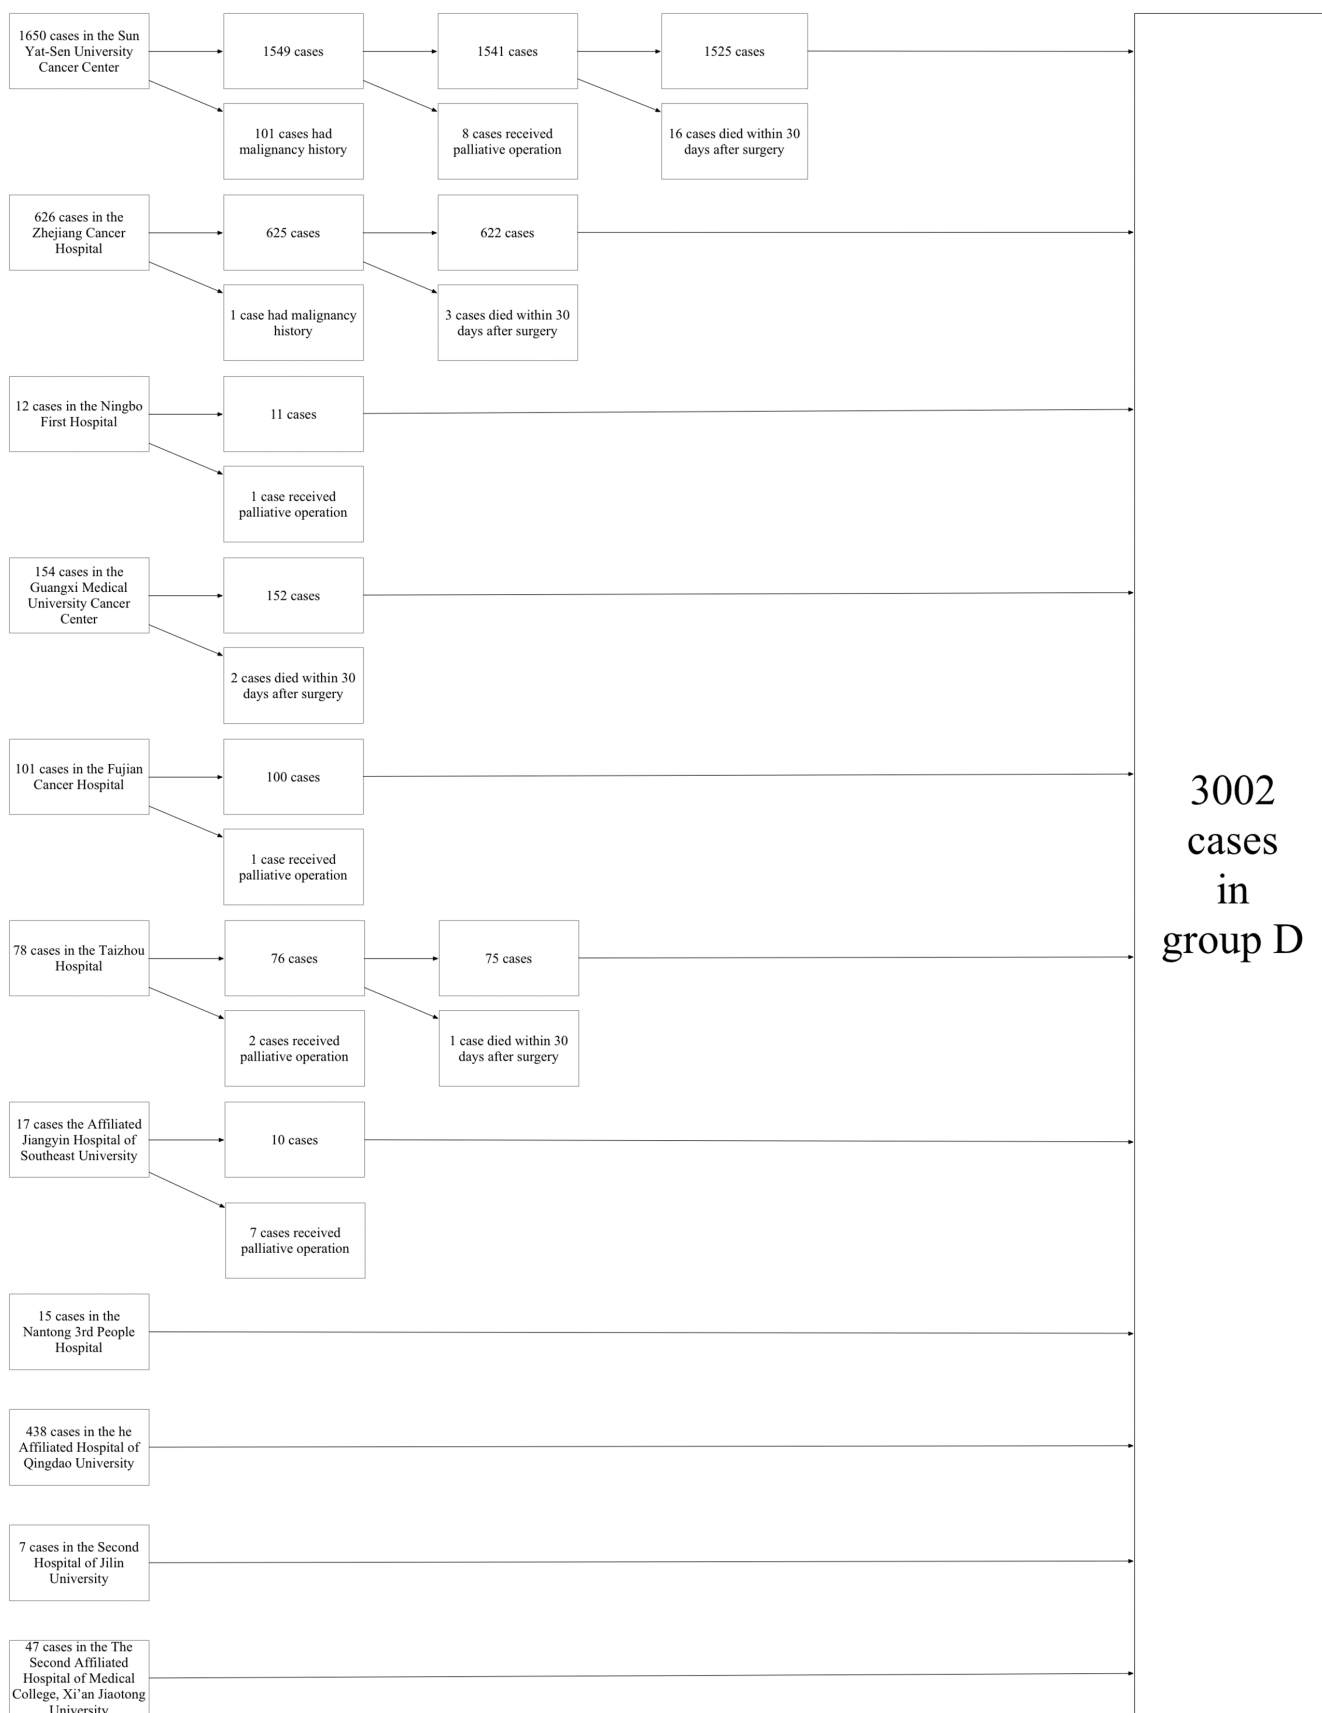

Figure S4 Diagram of group D selection steps.

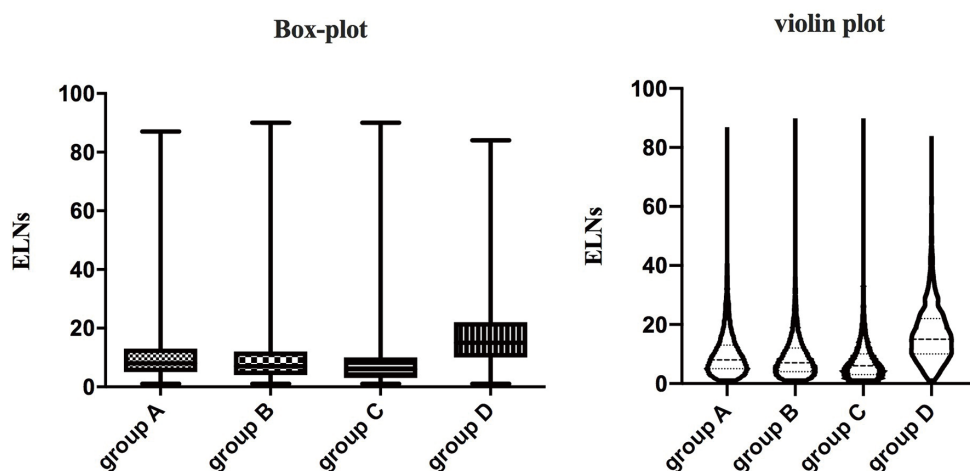

Figure S5 The examined lymph nodes of the entire study. ELNs, examined lymph nodes.

**Table S1** Patient characteristics of the entire study

| Characteristic       | Group A (n=12,423),<br>N (%) <sup>a</sup> | Group B (n=18,154),<br>N (%) <sup>a</sup> | Group C (n=21,522),<br>N (%) <sup>a</sup> | Group D (n=3,002),<br>N (%) <sup>a</sup> |
|----------------------|-------------------------------------------|-------------------------------------------|-------------------------------------------|------------------------------------------|
| ELNs, median [IQR]   | 8 [8]                                     | 7 [8]                                     | 6 [7]                                     | 15 [12]                                  |
| Age                  |                                           |                                           |                                           |                                          |
| <65 years            | 4,603 (37.1)                              | 6,870 (37.8)                              | 8,676 (40.3)                              | 1,988 (66.2)                             |
| ≥65 years            | 7,820 (62.9)                              | 11,284 (62.2)                             | 12,846 (59.7)                             | 1,014 (33.8)                             |
| Sex                  |                                           |                                           |                                           |                                          |
| Male                 | 5,911 (47.6)                              | 8,857 (48.8)                              | 11,632 (54.0)                             | 1,892 (63.0)                             |
| Female               | 6,512 (52.4)                              | 9,297 (51.2)                              | 9,890 (46.0)                              | 1,110 (37.0)                             |
| T stage              |                                           |                                           |                                           |                                          |
| T1                   | 5,895 (47.5)                              | 8,847 (48.7)                              | 9,449 (43.9)                              | 1,215 (40.5)                             |
| T2                   | 4,885 (39.3)                              | 8,376 (46.1)                              | 10,790 (50.1)                             | 1,455 (48.5)                             |
| T3                   | 1,643 (13.2)                              | 931 (5.1)                                 | 1,283 (6.0)                               | 332 (11.1)                               |
| Histology            |                                           |                                           |                                           |                                          |
| SCC                  | 3,280 (26.4)                              | 5,061 (27.9)                              | 6,318 (29.4)                              | 837 (27.9)                               |
| AC                   | 7,587 (61.1)                              | 10,414 (57.4)                             | 11,868 (55.1)                             | 1,983 (66.1)                             |
| ASC                  | 311 (2.5)                                 | 461 (2.5)                                 | 630 (2.9)                                 | 88 (2.9)                                 |
| Other <sup>b</sup>   | 1,245 (10)                                | 2,218 (12.2)                              | 2,706 (12.6)                              | 94 (3.1)                                 |
| Race                 |                                           |                                           |                                           |                                          |
| White                | 10,292 (82.8)                             | 15,550 (85.6)                             | 18,318 (85.1)                             | NA <sup>d</sup>                          |
| Black                | 1,131 (9.1)                               | 1,422 (7.8)                               | 1,822 (8.5)                               | NA <sup>d</sup>                          |
| Other                | 959 (7.7)                                 | 1,156 (6.4)                               | 1,368 (6.4)                               | NA <sup>d</sup>                          |
| Unknown <sup>c</sup> | 41 (0.3)                                  | 26 (0.1)                                  | 14 (0.1)                                  | NA <sup>d</sup>                          |
| Marital              |                                           |                                           |                                           |                                          |
| Married              | 4,852 (39.1)                              | 6,927 (38.2)                              | 7,593 (35.3)                              | NA <sup>d</sup>                          |
| Other <sup>e</sup>   | 6,998 (56.3)                              | 10,782 (59.4)                             | 13,385 (62.2)                             | NA <sup>d</sup>                          |
| Unknown              | 573 (4.6)                                 | 445 (2.5)                                 | 544 (2.5)                                 | NA <sup>d</sup>                          |
| Grade                |                                           |                                           |                                           |                                          |
| I and II             | 7,769 (62.5)                              | 11,900 (56.1)                             | 2,455 (11.4)                              | NA <sup>d</sup>                          |
| III and IV           | 4,093 (33.0)                              | 6,779 (37.4)                              | 7,730 (35.9)                              | NA <sup>d</sup>                          |
| Unknown              | 561 (4.5)                                 | 1,185 (6.5)                               | 8,097 (37.6)                              | NA <sup>d</sup>                          |

<sup>a</sup>, percentages might not add up to 100% due to approximation; <sup>b</sup>, non-small cell not further defined; <sup>c</sup>, includes American Indian, Chinese, Japanese and other specified types of races; <sup>d</sup>, race, marriage, and grade are not included in Chinese multi-institutional registry; <sup>e</sup>, includes single (never married), separated, divorced, widowed and unmarried or domestic partner. ELNs, examined lymph nodes; IQR, interquartile; SCC, squamous cell carcinoma; AC, adenocarcinoma; ASC, adenosquamous carcinoma; NA, not available.

**Table S2** Patient characteristics (before PSM)

| Characteristic       | Group B, N (%) <sup>a</sup> |                       |         | Group C, N (%) <sup>a</sup> |                       |         | Group D, N (%) <sup>a</sup> |                       |
|----------------------|-----------------------------|-----------------------|---------|-----------------------------|-----------------------|---------|-----------------------------|-----------------------|
|                      | ELNs <10<br>(n=11,806)      | ELNs ≥10<br>(n=6,348) | P value | ELNs <10<br>(n=15,648)      | ELNs ≥10<br>(n=5,874) | P value | ELNs <10<br>(n=665)         | ELNs ≥10<br>(n=2,337) |
| Age                  |                             |                       | 0.324   |                             |                       | 0.034   |                             |                       |
| <65 years            | 4,437 (37.6)                | 2,433 (38.3)          |         | 6,240 (39.9)                | 2,436 (41.5)          |         | 414 (62.3)                  | 1,574 (67.4)          |
| ≥65 years            | 7,369 (62.4)                | 3,915 (61.7)          |         | 9,408 (60.1)                | 3,438 (58.5)          |         | 251 (37.6)                  | 763 (32.6)            |
| Sex                  |                             |                       | 0.012   |                             |                       | 0.000   |                             |                       |
| Male                 | 5,679 (48.1)                | 3,178 (50.1)          |         | 8,304 (53.1)                | 3,328 (56.7)          |         | 397 (59.7)                  | 1,495 (64.0)          |
| Female               | 6,127 (51.9)                | 3,170 (49.9)          |         | 7,344 (46.9)                | 2,546 (43.3)          |         | 268 (40.3)                  | 842 (36.0)            |
| T stage              |                             |                       | 0.000   |                             |                       | 0.000   |                             |                       |
| T1                   | 6,017 (51.0)                | 2,830 (44.6)          |         | 7,135 (45.6)                | 2,314 (39.4)          |         | 326 (49.0)                  | 889 (38.0)            |
| T2                   | 5,239 (44.4)                | 3,137 (49.4)          |         | 7,661 (49.0)                | 3,129 (53.3)          |         | 271 (40.8)                  | 1,184 (50.7)          |
| T3                   | 550 (4.7)                   | 381 (6.0)             |         | 852 (5.4)                   | 431 (7.3)             |         | 68 (10.2)                   | 264 (11.3)            |
| Histology            |                             |                       | 0.000   |                             |                       | 0.000   |                             |                       |
| SCC                  | 3,130 (26.5)                | 1,931 (30.4)          |         | 4,369 (27.9)                | 1,949 (33.2)          |         | 147 (22.1)                  | 690 (29.5)            |
| AC                   | 6,937 (58.8)                | 3,477 (54.8)          |         | 8,832 (56.4)                | 3,036 (51.7)          |         | 470 (70.7)                  | 1,513 (64.7)          |
| SAC                  | 306 (2.6)                   | 155 (2.4)             |         | 455 (2.9)                   | 175 (3.0)             |         | 24 (3.6)                    | 64 (2.7)              |
| Other <sup>b</sup>   | 1,433 (12.1)                | 785 (12.4)            |         | 1,992 (12.7)                | 714 (12.2)            |         | 24 (3.6)                    | 70 (3.0)              |
| Race                 |                             |                       | 0.000   |                             |                       | 0.000   |                             |                       |
| White                | 10,014<br>(84.8)            | 5,536 (87.2)          |         | 13,205<br>(84.4)            | 5,113 (87)            |         | NA <sup>d</sup>             | NA <sup>d</sup>       |
| Black                | 987 (8.4)                   | 435 (6.9)             |         | 1,375 (8.8)                 | 447 (7.6)             |         | NA <sup>d</sup>             | NA <sup>d</sup>       |
| Other                | 784 (6.6)                   | 372 (5.9)             |         | 1,056 (6.7)                 | 312 (5.3)             |         | NA <sup>d</sup>             | NA <sup>d</sup>       |
| Unknown <sup>c</sup> | 21 (0.2)                    | 5 (0.1)               |         | 12 (0.1)                    | 2 (0)                 |         | NA <sup>d</sup>             | NA <sup>d</sup>       |
| Marital              |                             |                       | 0.108   |                             |                       | 0.000   |                             |                       |
| Married              | 4,546 (38.5)                | 2,381 (37.5)          |         | 5,640 (36.0)                | 1,953 (33.2)          |         | NA <sup>d</sup>             | NA <sup>d</sup>       |
| Other <sup>e</sup>   | 6,956 (58.9)                | 3,826 (60.3)          |         | 9,626 (61.5)                | 3,759 (64.0)          |         | NA <sup>d</sup>             | NA <sup>d</sup>       |
| Unknown              | 304 (2.6)                   | 141 (2.2)             |         | 382 (2.4)                   | 162 (2.8)             |         | NA <sup>d</sup>             | NA <sup>d</sup>       |
| Grade                |                             |                       | 0.000   |                             |                       | 0.000   |                             |                       |
| I and II             | 6,745 (57.1)                | 3,445 (54.3)          |         | 7,416 (47.4)                | 2,769 (47.1)          |         | NA <sup>d</sup>             | NA <sup>d</sup>       |
| III and IV           | 4,281 (36.3)                | 2,498 (39.4)          |         | 6,588 (42.1)                | 2,617 (44.6)          |         | NA <sup>d</sup>             | NA <sup>d</sup>       |
| Unknown              | 780 (6.6)                   | 405 (6.4)             |         | 1,644 (10.5)                | 488 (8.3)             |         | NA <sup>d</sup>             | NA <sup>d</sup>       |

<sup>a</sup>, percentages might not add up to 100% due to approximation; <sup>b</sup>, non-small cell not further defined; <sup>c</sup>, includes American Indian, Chinese, Japanese and other specified types of races; <sup>d</sup>, race, marriage, and grade are not included in Chinese multi-institutional registry; <sup>e</sup>, includes single (never married), separated, divorced, widowed and unmarried or domestic partner. ELNs, examined lymph nodes; SCC, squamous cell carcinoma; AC, adenocarcinoma; ASC, adenosquamous carcinoma; NA, not available.

**Table S3** Patient characteristics (after PSM)

| Characteristic     | Group B, N (%) <sup>a</sup> |                       |         | Group C, N (%) <sup>a</sup> |                       |         | Group D, N (%) <sup>a</sup> |                       |
|--------------------|-----------------------------|-----------------------|---------|-----------------------------|-----------------------|---------|-----------------------------|-----------------------|
|                    | ELNs <10<br>(n=6,348)       | ELNs ≥10<br>(n=6,348) | P value | ELNs <10<br>(n=11,748)      | ELNs ≥10<br>(n=5,874) | P value | ELNs <10<br>(n=665)         | ELNs ≥10<br>(n=1,330) |
| Age                |                             |                       | 0.143   |                             |                       | 0.149   |                             |                       |
| <65 years          | 2,353 (37.1)                | 2,433 (38.3)          |         | 4,739 (40.3)                | 2,436 (41.5)          |         | 414 (62.3)                  | 823 (61.9)            |
| ≥65 years          | 3,995 (62.9)                | 3,915 (61.7)          |         | 7,009 (59.7)                | 3,438 (58.5)          |         | 251 (37.7)                  | 507 (38.1)            |
| Sex                |                             |                       | 0.915   |                             |                       | 0.389   |                             |                       |
| Male               | 3,172 (50.0)                | 3,178 (50.1)          |         | 6,736 (57.3)                | 3,328 (56.7)          |         | 397 (59.7)                  | 813 (61.1)            |
| Female             | 3,176 (50.0)                | 3,170 (49.9)          |         | 5,012 (42.7)                | 2,546 (43.3)          |         | 268 (40.3)                  | 517 (38.9)            |
| T stage            |                             |                       | 0.738   |                             |                       | 0.265   |                             |                       |
| T1                 | 2,847 (44.8)                | 2,830 (44.6)          |         | 4,714 (40.1)                | 2,314 (39.4)          |         | 326 (49.0)                  | 649 (48.8)            |
| T2                 | 3,158 (49.7)                | 3,137 (49.4)          |         | 6,244 (53.1)                | 3,129 (53.3)          |         | 271 (40.8)                  | 558 (42.0)            |
| T3                 | 343 (5.4)                   | 381 (6.0)             |         | 790 (6.7)                   | 431 (7.3)             |         | 68 (10.2)                   | 123 (9.2)             |
| Histology          |                             |                       | 0.787   |                             |                       | 0.090   |                             |                       |
| SCC                | 1,926 (30.3)                | 1,931 (30.4)          |         | 3,741 (31.8)                | 1,949 (33.2)          |         | 147 (22.1)                  | 297 (22.3)            |
| AC                 | 3,511 (55.3)                | 3,477 (54.8)          |         | 6,302 (53.6)                | 3,036 (51.7)          |         | 470 (70.7)                  | 940 (70.7)            |
| SAC                | 140 (2.2)                   | 155 (2.4)             |         | 317 (2.7)                   | 175 (3.0)             |         | 24 (3.6)                    | 40 (3.0)              |
| Other <sup>b</sup> | 771 (12.1)                  | 785 (12.4)            |         | 1,388 (11.8)                | 714 (12.2)            |         | 24 (3.6)                    | 53 (4.0)              |
| Race               |                             |                       | 0.838   |                             |                       | 0.224   |                             |                       |
| White              | 5,569 (87.7)                | 5,536 (87.2)          |         | 10,243<br>(87.2)            | 5,113 (87)            |         | NA <sup>d</sup>             | NA <sup>d</sup>       |
| Black              | 422 (6.6)                   | 435 (6.9)             |         | 905 (7.7)                   | 447 (7.6)             |         | NA <sup>d</sup>             | NA <sup>d</sup>       |
| Other <sup>c</sup> | 352 (5.5)                   | 372 (5.9)             |         | 600 (5.1)                   | 312 (5.3)             |         | NA <sup>d</sup>             | NA <sup>d</sup>       |
| Unknown            | 5 (0.1)                     | 5 (0.1)               |         | 0 (0)                       | 2 (0)                 |         | NA <sup>d</sup>             | NA <sup>d</sup>       |
| Marital            |                             |                       | 0.765   |                             |                       | 0.670   |                             |                       |
| Married            | 2,370 (37.3)                | 2,381 (37.5)          |         | 3,835 (32.6)                | 1,953 (33.2)          |         | NA <sup>d</sup>             | NA <sup>d</sup>       |
| Other <sup>e</sup> | 3,848 (60.6)                | 3,826 (60.3)          |         | 7,598 (64.7)                | 3,759 (64.0)          |         | NA <sup>d</sup>             | NA <sup>d</sup>       |
| Unknown            | 130 (2.0)                   | 141 (2.2)             |         | 315 (2.7)                   | 162 (2.8)             |         | NA <sup>d</sup>             | NA <sup>d</sup>       |
| Grade              |                             |                       | 0.538   |                             |                       | 0.729   |                             |                       |
| I and II           | 3,468 (54.6)                | 3,445 (54.3)          |         | 5,607 (47.7)                | 2,769 (47.1)          |         | NA <sup>d</sup>             | NA <sup>d</sup>       |
| III and IV         | 2,505 (39.5)                | 2,498 (39.4)          |         | 5,161 (43.9)                | 2,617 (44.6)          |         | NA <sup>d</sup>             | NA <sup>d</sup>       |
| Unknown            | 375 (5.9)                   | 405 (6.4)             |         | 980 (8.3)                   | 488 (8.3)             |         | NA <sup>d</sup>             | NA <sup>d</sup>       |

<sup>a</sup>, percentages might not add up to 100% due to approximation; <sup>b</sup>, non-small cell not further defined; <sup>c</sup>, Includes American Indian, Chinese, Japanese and other specified types of races; <sup>d</sup>, race, marriage, and grade are not included in Chinese multi-institutional registry; <sup>e</sup>, includes single (never married), separated, divorced, widowed and unmarried or domestic partner. ELNs, examined lymph nodes; IQR, interquartile; SCC, squamous cell carcinoma; AC, adenocarcinoma; ASC, adenosquamous carcinoma; NA, not available.

**Table S4** Cox proportional hazard multivariable analysis results for entire study

| Characteristic       | Group B, N (%) <sup>a</sup> |                       |         | Group C, N (%) <sup>a</sup> |                       |         | Group D, N (%) <sup>a</sup> |                       |
|----------------------|-----------------------------|-----------------------|---------|-----------------------------|-----------------------|---------|-----------------------------|-----------------------|
|                      | ELNs <10<br>(n=11,806)      | ELNs ≥10<br>(n=6,348) | P value | ELNs <10<br>(n=15,648)      | ELNs ≥10<br>(n=5,874) | P value | ELNs <10<br>(n=665)         | ELNs ≥10<br>(n=2,337) |
| Age                  |                             |                       | 0.324   |                             |                       | 0.034   |                             |                       |
| <65 years            | 4,437 (37.6)                | 2,433 (38.3)          |         | 6,240 (39.9)                | 2,436 (41.5)          |         | 414 (62.3)                  | 1,574 (67.4)          |
| ≥65 years            | 7,369 (62.4)                | 3,915 (61.7)          |         | 9,408 (60.1)                | 3,438 (58.5)          |         | 251 (37.6)                  | 763 (32.6)            |
| Sex                  |                             |                       | 0.012   |                             |                       | 0.000   |                             |                       |
| Male                 | 5,679 (48.1)                | 3,178 (50.1)          |         | 8,304 (53.1)                | 3,328 (56.7)          |         | 397 (59.7)                  | 1,495 (64.0)          |
| Female               | 6,127 (51.9)                | 3,170 (49.9)          |         | 7,344 (46.9)                | 2,546 (43.3)          |         | 268 (40.3)                  | 842 (36.0)            |
| T stage              |                             |                       | 0.000   |                             |                       | 0.000   |                             |                       |
| T1                   | 6,017 (51.0)                | 2,830 (44.6)          |         | 7,135 (45.6)                | 2,314 (39.4)          |         | 326 (49.0)                  | 889 (38.0)            |
| T2                   | 5,239 (44.4)                | 3,137 (49.4)          |         | 7,661 (49.0)                | 3,129 (53.3)          |         | 271 (40.8)                  | 1,184 (50.7)          |
| T3                   | 550 (4.7)                   | 381 (6.0)             |         | 852 (5.4)                   | 431 (7.3)             |         | 68 (10.2)                   | 264 (11.3)            |
| Histology            |                             |                       | 0.000   |                             |                       | 0.000   |                             |                       |
| SCC                  | 3,130 (26.5)                | 1,931 (30.4)          |         | 4,369 (27.9)                | 1,949 (33.2)          |         | 147 (22.1)                  | 690 (29.5)            |
| AC                   | 6,937 (58.8)                | 3,477 (54.8)          |         | 8,832 (56.4)                | 3,036 (51.7)          |         | 470 (70.7)                  | 1,513 (64.7)          |
| SAC                  | 306 (2.6)                   | 155 (2.4)             |         | 455 (2.9)                   | 175 (3.0)             |         | 24 (3.6)                    | 64 (2.7)              |
| Other <sup>b</sup>   | 1,433 (12.1)                | 785 (12.4)            |         | 1,992 (12.7)                | 714 (12.2)            |         | 24 (3.6)                    | 70 (3.0)              |
| Race                 |                             |                       | 0.000   |                             |                       | 0.000   |                             |                       |
| White                | 10,014<br>(84.8)            | 5,536 (87.2)          |         | 13,205<br>(84.4)            | 5,113 (87.0)          |         | NA <sup>d</sup>             | NA <sup>d</sup>       |
| Black                | 987 (8.4)                   | 435 (6.9)             |         | 1,375 (8.8)                 | 447 (7.6)             |         | NA <sup>d</sup>             | NA <sup>d</sup>       |
| Other                | 784 (6.6)                   | 372 (5.9)             |         | 1,056 (6.7)                 | 312 (5.3)             |         | NA <sup>d</sup>             | NA <sup>d</sup>       |
| Unknown <sup>c</sup> | 21 (0.2)                    | 5 (0.1)               |         | 12 (0.1)                    | 2 (0)                 |         | NA <sup>d</sup>             | NA <sup>d</sup>       |
| Marital              |                             |                       | 0.108   |                             |                       | 0.000   |                             |                       |
| Married              | 4,546 (38.5)                | 2,381 (37.5)          |         | 5,640 (36.0)                | 1,953 (33.2)          |         | NA <sup>d</sup>             | NA <sup>d</sup>       |
| Other <sup>e</sup>   | 6,956 (58.9)                | 3,826 (60.3)          |         | 9,626 (61.5)                | 3,759 (64)            |         | NA <sup>d</sup>             | NA <sup>d</sup>       |
| Unknown              | 304 (2.6)                   | 141 (2.2)             |         | 382 (2.4)                   | 162 (2.8)             |         | NA <sup>d</sup>             | NA <sup>d</sup>       |
| Grade                |                             |                       | 0.000   |                             |                       | 0.000   |                             |                       |
| I and II             | 6,745 (57.1)                | 3,445 (54.3)          |         | 7,416 (47.4)                | 2,769 (47.1)          |         | NA <sup>d</sup>             | NA <sup>d</sup>       |
| III and IV           | 4,281 (36.3)                | 2,498 (39.4)          |         | 6,588 (42.1)                | 2,617 (44.6)          |         | NA <sup>d</sup>             | NA <sup>d</sup>       |
| Unknown              | 780 (6.6)                   | 405 (6.4)             |         | 1,644 (10.5)                | 488 (8.3)             |         | NA <sup>d</sup>             | NA <sup>d</sup>       |

<sup>a</sup>, percentages might not add up to 100% due to approximation; <sup>b</sup>, non-small cell not further defined; <sup>c</sup>, includes American Indian, Chinese, Japanese and other specified types of races; <sup>d</sup>, race, marriage, and grade are not included in Chinese multi-institutional registry; <sup>e</sup>, includes single (never married), separated, divorced, widowed and unmarried or domestic partner. HR, hazard ratio; ELNs, examined lymph nodes; SCC, squamous cell carcinoma; AC, adenocarcinoma; ASC, adenosquamous carcinoma; NA, not available.
